# Supplementary material for: Exploring individual and structural factors influencing healthcare seeking behavior in the context of the Senegal's Universal Health Coverage program: a multilevel analysis from the ANRS-12399 Soignants Sénégal study
Source: Research Square preprint supplement (doi:10.21203/rs.3.rs-6471814/v1), 2025-05-09
Supplement: Supplementary file 1 [file b3840f5238bf5baa0621a5b3.docx]

# Appendix A: Characteristics of participants (N=313) and health facilities (N=6) in the present analysis

|  | **N or median [IQR]** | **%** |
| --- | --- | --- |
| **Individual characteristics (categorical)** |  |  |
| **In the last two months have you sought care for a health problem?** |  |  |
| *Yes* | 155 | 50.5% |
| *No* | 158 | 49.5% |
| **Sex** |  |  |
| *Male* | 115 | 36.7 |
| *Female* | 198 | 63.3 |
| **Have you been to school?** |  |  |
| *Yes* | 63 | 20.1 |
| *No* | 250 | 79.9 |
| **Are you married?** |  |  |
| *Yes* | 271 | 86.6 |
| *No* | 42 | 13.4 |
| **Have you ever heard of CBHI?** |  |  |
| *Yes* | 150 | 47.9 |
| *No* | 163 | 52.1 |
| **Do you have paid or free individual health insurance?** |  |  |
| *Yes* | 98 | 31.3 |
| *No* | 215 | 68.7 |
| **Household health insurance category** |  |  |
| *Voluntary (i.e., paying) member of CBHI* | 95 | 30.3 |
| *PNBSF beneficiary* | 66 | 21.1 |
| *No health insurance* | 152 | 48.6 |
| **In comparison to last year, how would you assess your current state of health?** | | |
| *Better* | 89 | 28.4 |
| *Similar* | 114 | 36.5 |
| *Not as good* | 110 | 35.1 |
| **Overall, do you think your health is….?** |  |  |
| *Very good to excellent* | 81 | 25.9 |
| *Good* | 178 | 56.9 |
| *Poor to very poor* | 54 | 17.2 |
| **Do you currently have a disability?** |  |  |
| *Yes* | 28 | 8.9 |
| *No* | 285 | 91.1 |
| **Do you have a chronic illness?** |  |  |
| *Yes* | 49 | 15.6 |
| *No* | 264 | 84.4 |
| **When you are sick, is trying to find the money to pay for care difficult?** |  |  |
| *Yes* | 274 | 87.5 |
| *No* | 39 | 12.5 |
| **When you are sick, is the distance from your home to a healthcare facility a problem?** |  |  |
| *Yes* | 174 | 55.6 |
| *No* | 139 | 44.4 |
| **When you are sick, is it difficult to find a means of transport to go to a healthcare facility?** |  |  |
| *Yes* | 141 | 45.1 |
| *No* | 172 | 54.9 |
| **When you are sick and you wish to receive medical care, does wanting someone to accompany to go to a healthcare facility create a problem for you?** |  |  |
| *Yes* | 55 | 17.6 |
| *No* | 258 | 82.4 |
| **In the last 12 months, how often have you had difficulties paying for food?** |  |  |
| *Never or rarely* | 183 | 58.5 |
| *Sometimes or always* | 130 | 41.5 |
| **Individual characteristics (continuous)** |  |  |
| **Age (years)** |  |  |
| *Median [IQR]* | 52 | [41⎯63] |
| *Min, Max* | 16 | 92 |
| **How many days did your illness last?** |  |  |
| *Median [IQR]* | 4 | [2⎯7] |
| *Min, Max* | 1 | >60 |
| **Number of dependent infants** |  |  |
| *Median [IQR]* | 3 | [0⎯5] |
| *Min, Max* | 0 | 18 |
| **Maximum amount you would be willing to pay each year for health insurance coverage (CFA francs)** |  |  |
| *Median [IQR]* | 3,609 | [2,406⎯4,812] |
| *Min, Max* | 0 | 25,024 |
| **In your opinion, what is the minimum monthly income you need to cover your household expenses? (CFA francs)** |  |  |
| *Median [IQR]* | 150,985 | [100,456⎯ 201,514] |
| *Min, Max* | 50,048 | 1,000,654 |
| **HF characteristics** | **N° of HFs (%)** | **N° of participants (%)** |
| **HF organization, health services provided and available human and material resources** |  |  |
| **Are you open 24/7?** |  |  |
| *Yes* | 3 (50,0%) | 23 (7,3%) |
| *No* | 3 (50,0%) | 290 (92,7%) |
| **Number of years since opening** |  |  |
| *Less than 40* | 3 (50.0) | 63 (20.1) |
| *40 years or more* | 3 (50.0) | 250 (79.9) |
| **Number of qualified healthcare workers** |  |  |
| *Fewer than three* | 4 (66,7%) | 177 (56,5%) |
| *Three or more* | 2 (33,3%) | 136 (43,5%) |
| **Number of support staff for healthcare workers** |  |  |
| *Fewer than 16* | 3 (50,0%) | 103 (32,9%) |
| *16 or more* | 3 (50,0%) | 210 (67,1%) |
| **Does your HF supply protective masks?** |  |  |
| *Yes* | 3 (50,0%) | 57 (18,2%) |
| *No* | 3 (50,0%) | 256 (81,8%) |
| **Does your HF supply protective eyewear?** |  |  |
| *Yes* | 4 (66,7%) | 68 (21,7%) |
| *No* | 2 (33,3%) | 245 (78,3%) |
| **Does your HF supply protective clothing/gloves and surface cleaners?** |  |  |
| *Yes* | 6 (100,0%) | 313 (100,0%) |
| *No* | 0 (0,0%) | 0 (0,0%) |
| **Does your HF have a computer?** |  |  |
| *No* | 4 (66,7%) | 177 (56,5%) |
| *Yes* | 2 (33,3%) | 136 (43,5%) |
| **Does your HF have a generator?** |  |  |
| *No* | 2 (33,3%) | 12 (3,8%) |
| *Yes* | 4 (66,7%) | 301 (96,2%) |
| **Does your HF have air conditioning?** |  |  |
| *Yes* | 3 (50,0%) | 23 (7,3%) |
| *No* | 3 (50,0%) | 290 (92,7%) |
| **Does your HF provide ultrasounds?** |  |  |
| *Yes* | 3 (50,0%) | 23 (7,3%) |
| *No, we have never had this service* | 3 (50,0%) | 290 (92,7%) |
| **Does your HF provide electrocardiograms?** |  |  |
| *Yes* | 2 (33,3%) | 18 (5,8%) |
| *No, we have never had this service* | 4 (66,7%) | 295 (94,2%) |
| **Does your facility have a CT scanner?** |  |  |
| *Yes* | 1 (16,7%) | 7 (2,2%) |
| *No, we have never had this service* | 5 (83,3%) | 306 (97,8%) |
| **Does your HF provide X-rays?** |  |  |
| *Yes* | 3 (50,0%) | 23 (7,3%) |
| *No, we have never had this service* | 3 (50,0%) | 290 (92,7%) |
| **Does your HF have a laboratory for biological tests?** |  |  |
| *Yes* | 4 (66,7%) | 177 (56,5%) |
| *No, we have never had this service* | 2 (33,3%) | 136 (43,5%) |
| **Does your HF provide immunization?** |  |  |
| *Yes* | 5 (83,3%) | 306 (97,8%) |
| *No, we have never had this service* | 1 (16,7%) | 7 (2,2%) |
| **Does your HF have a pharmacy**? |  |  |
| *Yes* | 5 (83,3%) | 306 (97,8%) |
| *No, we have never had this service* | 1 (16,7%) | 7 (2,2%) |
| **Does your HF have an ambulance or another transport vehicle?** |  |  |
| *Yes* | 5 (83,3%) | 222 (70,9%) |
| *No, we have never had this service* | 1 (16,7%) | 91 (29,1%) |
| **Does your pharmacy have analgesics?** |  |  |
| *Yes* | 5 (83,3%) | 306 (97,8%) |
| *No* | 1 (16,7%) | 7 (2,2%) |
| **Does your pharmacy have anti-inflammatory drugs?** |  |  |
| *Yes* | 5 (83,3%) | 306 (97,8%) |
| *No* | 1 (16,7%) | 7 (2,2%) |
| **Does your pharmacy have antiparasitic drugs?** |  |  |
| *Yes* | 5 (83,3%) | 306 (97,8%) |
| *No* | 1 (16,7%) | 7 (2,2%) |
| **Does your pharmacy have adrenaline?** |  |  |
| *Yes* | 4 (66,7%) | 215 (68,7%) |
| *No* | 2 (33,3%) | 98 (31,3%) |
| **Does your pharmacy have bronchodilators?** |  |  |
| *Yes* | 4 (66,7%) | 152 (48,6%) |
| *No* | 2 (33,3%) | 161 (51,4%) |
| **Does your pharmacy have saline solution?** |  |  |
| *Yes* | 5 (83,3%) | 306 (97,8%) |
| *No* | 1 (16,7%) | 7 (2,2%) |
| **Does your pharmacy have glucose solution?** |  |  |
| *Yes* | 5 (83,3%) | 306 (97,8%) |
| *No* | 1 (16,7%) | 7 (2,2%) |
| **Does your pharmacy have antihistamines (antiallergics)?** |  |  |
| *Yes* | 5 (83,3%) | 306 (97,8%) |
| *No* | 1 (16,7%) | 7 (2,2%) |
| **Does your pharmacy have expectorants?** |  |  |
| *Yes* | 5 (83,3%) | 306 (97,8%) |
| *No* | 1 (16,7%) | 7 (2,2%) |
| **Does your pharmacy have iron supplements?** |  |  |
| *Yes* | 5 (83,3%) | 306 (97,8%) |
| *No* | 1 (16,7%) | 7 (2,2%) |
| **Does your pharmacy have antibiotics?** |  |  |
| *Yes* | 5 (83,3%) | 306 (97,8%) |
| *No* | 1 (16,7%) | 7 (2,2%) |
| **Does your pharmacy have anesthetics?** |  |  |
| *Yes* | 4 (66,7%) | 295 (94,2%) |
| *No* | 2 (33,3%) | 18 (5,8%) |
| **Are electricity expenses the responsibility of your health facility?** | |  |
| *No* | 3 (50,0%) | 290 (92,7%) |
| *Yes* | 3 (50,0%) | 23 (7,3%) |
| **Are water expenses the responsibility of your health facility?** |  |  |
| *No* | 3 (50,0%) | 290 (92,7%) |
| *Yes* | 3 (50,0%) | 23 (7,3%) |
| **Are maintenance expenses the responsibility of your HF?** |  |  |
| *No* | 6 (100,0%) | 313 (100,0%) |
| *Yes* | 0 (0,0%) | 0 (0,0%) |
| **Maintenance expenses ('CFA francs')** |  |  |
| *Less than 50,000* | 4 (66,7%) | 68 (21,7%) |
| *50,000 or more* | 2 (33,3%) | 245 (78,3%) |
| **Price of a general medicine consultation (CFA francs)** |  |  |
| *Less than 1,000* | 2 (33,3%) | 136 (43,5%) |
| *1,000 or more* | 4 (66,7%) | 177 (56,5%) |
| **Price of a maternity consultation (CFA francs)** |  |  |
| *Less than 1,000* | 3 (50,0%) | 61 (19,5%) |
| *1,000 or more* | 3 (50,0%) | 252 (80,5%) |
| **Cost of medical evacuation (Medevac)** |  |  |
| *Free of charge* | 4 (66,7%) | 114 (36,4%) |
| *Fee charged* | 2 (33,3%) | 199 (63,6%) |
| **Supply of UHC services** | | |
| **Providing services to CBHI members (whether paying or not)** |  |  |
| *Yes* | 6 (100.0) | 313 (100.0) |
| **SESAME Plan (i.e., free care for over 60 years old)** |  |  |
| *Yes* | 6 (100.0) | 313 (100.0) |
| **Free care for children under 5 years** |  |  |
| *Yes* | 6 (100.0) | 313 (100.0) |
| **Free dialysis** |  |  |
| *Yes* | 2 (33.3) | 12 (3.8) |
| *No, we have never had this service* | 4 (66.7) | 301 (96.2) |
| **Free cesarean sections** |  |  |
| *Yes* | 1 (16.7) | 7 (2.2) |
| *No, we have never had this service* | 5 (83.3) | 306 (97.8) |
| **Effects of UHC on HF** | | |
| **Long delays awaiting reimbursement** |  |  |
| *Yes* | 4 (66.7) | 295 (94.3) |
| *No* | 2 (33.3) | 18 (5.7) |
| **Difficulties processing UHC program-related data** |  |  |
| *Yes* | 1 (16.7) | 154 (49.2) |
| *No* | 5 (83.3) | 159 (50.8) |
| **Insufficient staff** |  |  |
| *Yes* | 1 (16.7) | 154 (49.2) |
| *No* | 5 (83.3) | 159 (50.8) |
| **Deterioration of the facility’s organization** |  |  |
| *Yes* | 3 (50.0) | 204 (65.2) |
| *No* | 3 (50.0) | 109 (34.8) |
| **Increase in the number of staff** |  |  |
| *Yes* | 2 (33.3) | 159 (50.8) |
| *No* | 4 (66.7) | 154 (49.2) |
| **Reallocation of staff to cover UHC** **activities** |  |  |
| *Yes* | 1 (16.7) | 5 (1.6) |
| *No* | 5 (83.3) | 308 (98.4) |
| **Healthcare worker complaints about increased workload** |  |  |
| *Yes* | 1 (16.7) | 5 (1.6) |
| *No* | 5 (83.3) | 308 (98.4) |
| **Amount owed to the healthcare facility by the ANACMU? (CFA francs)** | |  |
| *Less than 10 million* | 3 (50.0) | 147 (47.0) |
| *More than 10 million* | 3 (50.0) | 166 (53.0) |
| **Supply of HIV and Tuberculosis services** | | |
| **Consultations for key populations** |  |  |
| *Yes* | 3 (50.0) | 57 (18.2) |
| *No, the service never existed* | 3 (50.0) | 256 (81.8) |
| **Psychological support** |  |  |
| *Yes* | 3 (50.0) | 57 (18.2) |
| *No, the service never existed* | 3 (50.0) | 256 (81.8) |
| **HIV screening** |  |  |
| *Yes* | 5 (83.3) | 222 (70.9) |
| *No, the service never existed* | 1 (16.7) | 91 (29.1) |
| **HIV care** |  |  |
| *Yes* | 4 (66.7) | 68 (21.7) |
| *No, we have never provided this service* | 2 (33.3) | 245 (78.3) |
| **ART dispensing** |  |  |
| *Yes* | 4 (66.7) | 68 (21.7) |
| *No, we have never provided this service* | 2 (33.3) | 245 (78.3) |
| **Tuberculosis care?** |  |  |
| *Yes* | 4 (66.7) | 152 (48.6) |
| *No, we have never provided this service* | 2 (33.3) | 161 (51.4) |
| **Tuberculosis medicine** |  |  |
| *Yes* | 3 (50.0) | 61 (19.5) |
| *No, we have never provided this service* | 3 (50.0) | 252 (80.5) |
| **Educational talks about** **HIV (irrespective of whether or not condoms and lubricant gel are also supplied)?** |  |  |
| *Yes* | 4 (66.7) | 215 (68.7) |
| *No, we have never provided this service* | 2 (33.3) | 98 (31.3) |
| **Therapeutic patient education and discussion groups for HIV, Tuberculosis, or Hepatitis** |  |  |
| *Yes* | 3 (50.0) | 23 (7.4) |
| *No, we have never provided this service* | 3 (50.0) | 290 (92.6) |
| **HIV post-exposure prophylaxis** |  |  |
| *Yes* | 3 (50.0) | 23 (7.4) |
| *No, we have never provided this service* | 3 (50.0) | 290 (92.6) |

# Appendix B: Descriptive analysis of study population according to Healthcare seeking behavior status

|  | Have you been to a HF? | | | | P-value | |
| --- | --- | --- | --- | --- | --- | --- |
|  | No | Yes | | Total | |  | |
| **N** | 158 (50.5%) | 155 (49.5%) | | 313 (100%) | |  | |
| **Individual characteristics (categorical)** | | |  | |  | |
| **Have you been to school?** |  |  | |  | |  | |
| *Yes* | 30 (18.99%) | 33 (21.29%) | | 63 (20.13%) | | 0.673 | |
| *No* | 128 (81.01%) | 122 (78.71%) | | 250 (79.87%) | |
| **Are you married?** |  |  | |  | |  | |
| *Yes* | 139 (87.97%) | 132 (85.16%) | | 271 (86.58%) | | 0.510 | |
| *No* | 19 (12.03%) | 23 (14.84%) | | 42 (13.42%) | |
| **Have you ever heard of CBHI?** |  |  | |  | |  | |
| *Yes* | 70 (44.30%) | 80 (51.61%) | | 150 (47.92%) | | 0.510 | |
| *No* | 88 (55.70%) | 75 (48.39%) | | 163 (52.08%) | |
| **Do you have paid or free individual health insurance?** | | | | |  | |
| *Yes* | 46 (29.11%) | 52 (33.55%) | | 98 (31.31%) | | 0.465 | |
| *No* | 112 (70.89%) | 103 (66.45%) | | 215 (68.69%) | |
| **Household health insurance category** | | |  | |  | |
| *Voluntary (i.e., paying) member of CBHI* | 37 (23.42%) | 58 (37.42%) | | 95 (30.35%) | | 0.023 | |
| *PNBSF beneficiary* | 35 (22.15%) | 31 (20.00%) | | 66 (21.09%) | |
| *No health insurance* | 86 (54.43%) | 66 (42.58%) | | 152 (48.56%) | |
| **Overall, do you think your health is…?** | |  | |  | |  | |
| *Very good to excellent* | 43 (27.22%) | 38 (24.52%) | | 81 (25.88%) | | 0.595 | |
| *Good* | 91 (57.59%) | 87 (56.13%) | | 178 (56.87%) | |
| *Poor to very poor* | 24 (15.19%) | 30 (19.35%) | | 54 (17.25%) | |
| **Do you currently have a disability?** | | | | |  | |
| *Yes* | 17 (10.76%) | 11 (7.10%) | | 28 (8.9) | | 0.323 | |
| *No* | 141 (89.24%) | 144 (92.90%) | | 285 (91.1) | |
| **Do you have a chronic illness?** |  |  | |  | |  | |
| *Yes* | 19 (12.03%) | 30 (19.35%) | | 49 (15.6) | | 0.087 | |
| *No* | 139 (87.97%) | 125 (80.65%) | | 264 (84.4) | |
| **When you are sick, is trying to find the money to pay for care difficult?** | | | | |  | |
| *Yes* | 143 (90.51%) | 131 (84.52%) | | 274 (87.5) | | 0.125 | |
| *No* | 15 (9.49%) | 24 (15.48%) | | 39 (12.5) | |
| **When you are sick, is the distance from your home to a healthcare facility a problem?** | | | | |  | |
| *Yes* | 98 (62.03%) | 76 (49.03%) | | 174 (55.6) | | 0.023 | |
| *No* | 60 (37.97%) | 79 (50.97%) | | 139 (44.4) | |
| **When you are sick, is it difficult to find a means of transport to go to a healthcare facility?** | | | | |  | |
| *Yes* | 81 (51.27%) | 60 (38.71%) | | 141 (45.1) | | 0.031 | |
| *No* | 77 (48.73%) | 95 (61.29%) | | 172 (54.9) | |
| **When you are sick and you wish to receive medical care, does wanting someone to accompany to go to a healthcare facility create a problem for you?** | | | | |  | |
| *Yes* | 33 (20.89%) | 22 (14.19%) | | 55 (17.6) | | 0.138 | |
| *No* | 125 (79.11%) | 133 (85.81%) | | 258 (82.4) | |
| **In the last 12 months, how often have you had difficulties paying for food?** | | | | |  | |
| *Never or rarely* | 81 (51.27%) | 102 (65.81%) | | 183 (58.5) | | 0.012 | |
| *Sometimes or always* | 77 (48.73%) | 53 (34.19%) | | 130 (41.5) | |
| **Individual characteristics (continuous)** | | |  | |  | |
| **Age (years)** |  |  | |  | |  | |
| *Median [IQR]* | 53 [42; 63] | 51 [41; 63] | | 52 [41; 63] | | 0.586 | |
| *Min*⎯*Max:* | 19-90 | 16-92 | | 16-92 | |
| **How many days did your illness last?** |  |  | |  | |  | |
| *Median [IQR]* | 3 [2; 5] | 4.5 [3; 10] | | 4 [2; 7] | | <0.001 | |
| *Min, Max* | 1 ⎯ >60 | 1 ⎯ >60 | | 1 ⎯ >60 | |
| **Number of dependent infants** | | |  | |  | |
| *Median [IQR]* | 3 [0; 5] | 3 [0; 6] | | 3 [0; 5] | | 0.952 | |
| *Min*⎯*Max:* | 0-13 | 0-18 | | 0-18 | |
| **Maximum amount you would be willing to pay each year for health insurance coverage (CFA francs)** | | | | |  | |
| *Median [IQR]* | 3,609 [2,587⎯5,113] | 3,609 [2,587⎯5,113] | | 3,609 [2,587⎯5,113] | | 0.455 | |
| *Min*⎯*Max:* | 1,023-25,565 | 0-20,452 | | 0-25,565 | |
| **In your opinion, what is the minimum monthly income you need to cover your household expenses? (CFA francs)** | | | | |  | |
| *Median [IQR]* | 3,609 [2,587⎯ 5,113] | 132,939 [102,261⎯ 204,522] | | 153,391 [102,261⎯ 204,522] | | 0.791 | |
| *Min*⎯*Max:* | 51,130-1,022,610 | 51,130-715,827 | | 51,130-1,022,610 | |

# Appendix C: Characteristics of health facilities

|  | **Health Facilities** | | | | | |
| --- | --- | --- | --- | --- | --- | --- |
|  | **Regional Hospital of Fatick** | **Health center in Fatick town** | **Health center in Niakhar town** | **Diohine public Health Post** | **Toucar Health Post** | **Ngayokhème Health Post** |
| **HF organization, health services provided and availability of human and material resources** | | | | | |  |
| Open 24/7 | ✓ | ✓ | ✓ |  |  |  |
| More than 3 qualified healthcare workers | ✓ | ✓ | ✓ |  |  | ✓ |
| More than 16 support staff for healthcare workers | ✓ | ✓ |  |  | ✓ |  |
| Supply of protective masks | ✓ | ✓ |  | ✓ |  |  |
| Supply of protective eyewear | ✓ | ✓ | ✓ | ✓ |  |  |
| Supply of protective clothing/gloves and surface cleaners | ✓ | ✓ | ✓ | ✓ | ✓ | ✓ |
| HF having a computer | ✓ | ✓ | ✓ |  |  | ✓ |
| HF having a generator | ✓ | ✓ |  |  |  |  |
| HF having air conditioning | ✓ | ✓ | ✓ |  |  |  |
| HF providing ultrasounds | ✓ | ✓ | ✓ |  |  |  |
| HF providing electrocardiograms | ✓ |  | ✓ |  |  |  |
| HF having a CT scanner | ✓ |  |  |  |  |  |
| HF providing X-rays | ✓ | ✓ | ✓ |  |  |  |
| HF having a laboratory for biological tests | ✓ | ✓ | ✓ |  |  | ✓ |
| HF providing immunization |  | ✓ | ✓ | ✓ | ✓ | ✓ |
| HF having a pharmacy | ✓ | ✓ | ✓ | ✓ |  | ✓ |
| Ambulance available | ✓ | ✓ | ✓ | ✓ |  | ✓ |
| Supply of analgesics |  | ✓ | ✓ | ✓ | ✓ | ✓ |
| Supply of anti-inflammatory drugs |  | ✓ | ✓ | ✓ | ✓ | ✓ |
| Supply of antiparasitic |  | ✓ | ✓ | ✓ | ✓ | ✓ |
| Supply of adrenaline |  | ✓ | ✓ | ✓ |  | ✓ |
| Supply of bronchodilators |  | ✓ | ✓ | ✓ | ✓ |  |
| Supply of saline solution |  | ✓ | ✓ | ✓ | ✓ | ✓ |
| Supply of glucose solution |  | ✓ | ✓ | ✓ | ✓ | ✓ |
| Supply of antihistamines (antiallergics) |  | ✓ | ✓ | ✓ | ✓ | ✓ |
| Supply of expectorants |  | ✓ | ✓ | ✓ | ✓ | ✓ |
| Supply of iron supplements |  | ✓ | ✓ | ✓ | ✓ | ✓ |
| Supply of antibiotics |  | ✓ | ✓ | ✓ | ✓ | ✓ |
| Supply of anesthetics |  | ✓ |  | ✓ | ✓ | ✓ |
| Electricity expenses under the responsibility of the health facility |  |  |  | ✓ | ✓ | ✓ |
| Water expenses under the responsibility of the health facility |  |  |  | ✓ | ✓ | ✓ |
| Maintenance expenses under the responsibility of the health facility | ✓ | ✓ | ✓ | ✓ | ✓ | ✓ |
| Maintenance expenses of 50,000 CFA francs or more | ✓ | ✓ | ✓ | ✓ |  |  |
| General medicine consultation costs less than 1,000 CFA francs |  |  |  | ✓ | ✓ |  |
| Maternity consultation costs less than 1,000 CFA francs |  | ✓ | ✓ | ✓ |  |  |
| Free medical evacuation (Medevac) | ✓ | ✓ | ✓ |  | ✓ |  |
| **Supply of UHC services** |  |  |  |  |  |  |
| HF providing services to CBHI members | ✓ | ✓ | ✓ | ✓ | ✓ | ✓ |
| HF providing services under the SESAME Plan (i.e., free care for over 60 years old) | ✓ | ✓ | ✓ | ✓ | ✓ | ✓ |
| HF providing free care for children under 5 years | ✓ | ✓ | ✓ | ✓ | ✓ | ✓ |
| HF providing free dialysis | ✓ | ✓ |  |  |  |  |
| HF providing free cesarean sections | ✓ |  |  |  |  |  |
| **Effects of UHC on HF** |  |  |  |  |  |  |
| Long delays awaiting reimbursement |  | ✓ |  | ✓ | ✓ | ✓ |
| Difficulties processing UHC program-related data |  |  |  |  |  | ✓ |
| Insufficient staff |  |  |  |  |  | ✓ |
| Deterioration of the facility’s organization |  | ✓ |  | ✓ |  | ✓ |
| Increase in the number of staffs |  | ✓ |  |  |  | ✓ |
| Reallocation of staff to cover UHC activities |  | ✓ |  |  |  |  |
| Healthcare worker complaints about increased workload |  | ✓ |  |  |  |  |
| Amount owed to the healthcare facility by the ANACMU exceeding 10 million CFA francs | ✓ | ✓ |  |  |  | ✓ |
| **Supply of HIV and Tuberculosis services** |  |  |  |  |  |  |
| HF providing consultations for key populations | ✓ | ✓ |  | ✓ |  |  |
| HF providing psychological support | ✓ | ✓ |  | ✓ |  |  |
| HF providing HIV screening | ✓ | ✓ | ✓ | ✓ |  | ✓ |
| HF providing HIV care (Adult or pediatric) | ✓ | ✓ | ✓ | ✓ |  |  |
| HF providing ART treatment | ✓ | ✓ | ✓ | ✓ |  |  |
| HF providing tuberculosis care |  | ✓ | ✓ | ✓ | ✓ |  |
| HF providing tuberculosis medicine |  | ✓ | ✓ | ✓ |  |  |
| HF providing educational talks about HIV (irrespective of whether or not condoms and lubricant gel are also supplied) |  | ✓ | ✓ | ✓ |  | ✓ |
| HF providing therapeutic patient education and discussion groups for HIV, Tuberculosis, or Hepatitis | ✓ | ✓ |  |  |  |  |
| HIV post-exposure prophylaxis | ✓ | ✓ | ✓ |  |  |  |

# Appendix D: Contributions of variables to the MCA and HCA

| **Variables** | **Categories** | **Inertia** | **Dimension 1 (x-axis)** | | **Dimension 2 (y-axis)** | |
| --- | --- | --- | --- | --- | --- | --- |
| Discrimination | Contribution (%) | Discrimination | Contribution (%) |
| Are you open 24/7? | Yes | 0.016 | 1.152 | 0.018 | 0.860 | 0.010 |
| No | 0.016 | -1.152 | 0.018 | -0.860 | 0.010 |
| Health professionals | Fewer than 3 | 0.015 | -1.078 | 0.016 | -0.870 | 0.011 |
| 3 or more | 0.015 | 1.078 | 0.016 | 0.870 | 0.011 |
| Health professionals support | Fewer than 16 | 0.005 | -0.539 | 0.004 | 0.022 | 0.000 |
| 16 or more | 0.005 | 0.539 | 0.004 | -0.022 | 0.000 |
| Does your HF supply protective masks? | Yes | 0.008 | 0.631 | 0.006 | 0.468 | 0.003 |
| No | 0.008 | -0.631 | 0.006 | -0.468 | 0.003 |
| Does your HF supply protective eyewear? | Yes | 0.013 | 1.002 | 0.014 | 0.977 | 0.013 |
| No | 0.013 | -1.002 | 0.014 | -0.977 | 0.013 |
| Does your HF supply protective clothing/gloves and surface cleaners? | Yes | 0.002 | 0.091 | 0.000 | -0.060 | 0.000 |
| No | 0.011 | -0.639 | 0.001 | 0.422 | 0.001 |
| Does your HF have a computer? | Yes | 0.015 | 1.078 | 0.016 | 0.870 | 0.011 |
| No | 0.015 | -1.078 | 0.016 | -0.870 | 0.011 |
| Does your HF have a generator? | Yes | 0.014 | 1.254 | 0.016 | 0.327 | 0.001 |
| No | 0.009 | -0.752 | 0.010 | -0.196 | 0.001 |
| Does your HF have air conditioning? | Yes | 0.024 | 1.748 | 0.032 | 1.006 | 0.011 |
| No | 0.015 | -1.049 | 0.019 | -0.603 | 0.006 |
| Does your HF provide ultrasounds? | Yes | 0.024 | 1.748 | 0.032 | 1.006 | 0.011 |
| No, we have never had this service | 0.015 | -1.049 | 0.019 | -0.603 | 0.006 |
| Does your HF provide electrocardiograms? | Yes | 0.023 | 2.224 | 0.034 | 0.245 | 0.000 |
| No, we have never had this service | 0.008 | -0.741 | 0.011 | -0.082 | 0.000 |
| Does your HF provide CT-scanner? | Yes | 0.034 | 3.603 | 0.045 | -1.968 | 0.013 |
| No, we have never had this service | 0.005 | -0.515 | 0.006 | 0.281 | 0.002 |
| Does your HF provide X-rays? | Yes | 0.024 | 1.748 | 0.032 | 1.006 | 0.011 |
| No, we have never had this service | 0.015 | -1.049 | 0.019 | -0.603 | 0.006 |
| Does your HF have a laboratory for biological tests? | Yes | 0.015 | 1.078 | 0.016 | 0.870 | 0.011 |
| No, we have never had this service | 0.015 | -1.078 | 0.016 | -0.870 | 0.011 |
| Does your HF provide immunization? | Yes | 0.005 | -0.515 | 0.006 | 0.281 | 0.002 |
| No, we have never had this service | 0.034 | 3.603 | 0.045 | -1.968 | 0.013 |
| Does your HF have a pharmacy? | Yes | 0.002 | 0.229 | 0.001 | 0.153 | 0.001 |
| No, we have never had this service | 0.011 | -1.606 | 0.009 | -1.068 | 0.004 |
| Does your HF have an ambulance? | Yes | 0.006 | 0.406 | 0.003 | 0.799 | 0.013 |
| No, we have never had this service | 0.019 | -1.218 | 0.010 | -2.396 | 0.040 |
| Does your pharmacy have analgesics? | Yes | 0.008 | -0.462 | 0.004 | 0.949 | 0.019 |
| No | 0.023 | 1.387 | 0.013 | -2.846 | 0.056 |
| Does your pharmacy have anti-inflammatory drugs? | Yes | 0.008 | -0.462 | 0.004 | 0.949 | 0.019 |
| No | 0.023 | 1.387 | 0.013 | -2.846 | 0.056 |
| Does your pharmacy have antiparasitic drugs? | Yes | 0.008 | -0.462 | 0.004 | 0.949 | 0.019 |
| No | 0.023 | 1.387 | 0.013 | -2.846 | 0.056 |
| Does your pharmacy have adrenaline? | Yes | 0.009 | -0.234 | 0.001 | 1.352 | 0.032 |
| No | 0.015 | 0.389 | 0.002 | -2.254 | 0.053 |
| Does your pharmacy have bronchodilators? | Yes | 0.008 | -0.300 | 0.001 | 1.202 | 0.020 |
| No | 0.008 | 0.300 | 0.001 | -1.202 | 0.020 |
| Does your pharmacy have saline solution? | Yes | 0.005 | -0.515 | 0.006 | 0.281 | 0.002 |
| No | 0.034 | 3.603 | 0.045 | -1.968 | 0.013 |
| Does your pharmacy have glucose solution? | Yes | 0.005 | -0.515 | 0.006 | 0.281 | 0.002 |
| No | 0.034 | 3.603 | 0.045 | -1.968 | 0.013 |
| Does your pharmacy have antihistamines (antiallergics)? | Yes | 0.008 | -0.462 | 0.004 | 0.949 | 0.019 |
| No | 0.023 | 1.387 | 0.013 | -2.846 | 0.056 |
| Does your pharmacy have expectorants? | Yes | 0.009 | -0.427 | 0.003 | 1.054 | 0.019 |
| No | 0.014 | 0.712 | 0.005 | -1.757 | 0.032 |
| Does your pharmacy have iron supplements? | Yes | 0.005 | -0.515 | 0.006 | 0.281 | 0.002 |
| No | 0.034 | 3.603 | 0.045 | -1.968 | 0.013 |
| Does your pharmacy have antibiotics? | Yes | 0.005 | -0.515 | 0.006 | 0.281 | 0.002 |
| No | 0.034 | 3.603 | 0.045 | -1.968 | 0.013 |
| Does your pharmacy have anesthetics? | Yes | 0.008 | -0.762 | 0.010 | -0.183 | 0.001 |
| No | 0.013 | 1.269 | 0.017 | 0.304 | 0.001 |
| Are electricity expenses the responsibility of your health facility? | Yes | 0.014 | -1.259 | 0.017 | 0.095 | 0.000 |
| No | 0.008 | 0.755 | 0.010 | -0.057 | 0.000 |
| Are water expenses the responsibility of your health facility? | Yes | 0.015 | -1.049 | 0.019 | -0.603 | 0.006 |
| No | 0.024 | 1.748 | 0.032 | 1.006 | 0.011 |
| Are maintenance expenses the responsibility of your health facility? | Yes | 0.002 | 0.118 | 0.000 | 0.532 | 0.007 |
| No | 0.016 | -0.829 | 0.002 | -3.724 | 0.048 |
| Maintenance expenses ('CFA francs') | Less than 50,000 | 0.016 | -1.123 | 0.013 | -1.443 | 0.022 |
| 50,000 or more | 0.010 | 0.674 | 0.008 | 0.866 | 0.013 |
| Price of a general medicine consultation ('CFA francs') | Less than 1,000 | 0.015 | -1.078 | 0.016 | -0.870 | 0.011 |
| 1,000 or more | 0.015 | 1.078 | 0.016 | 0.870 | 0.011 |
| Price of a maternity consultation ('CFA francs') | Less than 1,000 | 0.010 | -0.059 | 0.000 | 1.574 | 0.034 |
| 1,000 or more | 0.010 | 0.059 | 0.000 | -1.574 | 0.034 |
| Cost of medical evacuation (Medevac) | Free of charge | 0.006 | 0.562 | 0.005 | -0.355 | 0.002 |
| Charged | 0.011 | -0.937 | 0.009 | 0.592 | 0.004 |
| Inertia |  |  | 0.1403 |  | 0.0506 |  |
| % of projected inertia |  |  | 62.6 |  | 22.5 |  |
| **UHC-related services** |  |  |  |  |  |  |
| Free dialysis | Yes | 0.157 | 1.960 | 9.6 | 3.680 | 33.9 |
| No | 0.022 | -0.280 | 1.4 | -0.526 | 4.8 |
| Providing services to CBHI members (whether paying or not) | Yes | 0.030 | 0.446 | 3.5 | -0.264 | 1.2 |
| No | 0.212 | -3.121 | 24.4 | 1.851 | 8.6 |
| SESAME Plan (i.e., free care for over 60 years old) | Yes | 0.039 | 0.611 | 5.6 | -0.224 | 0.2 |
| No | 0.118 | -1.832 | 16.8 | 0.673 | 2.3 |
| Free care for children under 5 years | Yes | 0.030 | 0.446 | 3.5 | -0.264 | 1.2 |
| No | 0.212 | -3.121 | 24.4 | 1.851 | 8.6 |
| Free cesarean sections | Yes | 0.157 | 1.960 | 9.6 | 3.680 | 33.9 |
| No | 0.022 | -0.280 | 1.4 | -0.526 | 4.8 |
| Inertia |  |  | 0.1949 |  | 0.0395 |  |
| % of projected inertia |  |  | 64.3 |  | 13.0 |  |
| ***UHC effects on HFs*** |  |  |  |  |  |  |
| Long delays awaiting reimbursement | Yes | 0.015 | 0.415 | 0.016 | 0.156 | 0.002 |
| No | 0.044 | -1.246 | 0.048 | -0.469 | 0.007 |
| Difficulties processing UHC program-related | Yes | 0.045 | 0.326 | 0.003 | -2.823 | 0.249 |
| No | 0.015 | -0.109 | 0.001 | 0.941 | 0.083 |
| Insufficient staff | Yes | 0.095 | 1.842 | 0.053 | -4.292 | 0.288 |
| No | 0.014 | -0.263 | 0.008 | 0.613 | 0.041 |
| Deterioration of the facility's organization | Yes | 0.082 | 1.496 | 0.105 | -0.318 | 0.005 |
| No | 0.049 | -0.898 | 0.063 | 0.191 | 0.003 |
| Increase in the number of staff | Yes | 0.150 | 2.371 | 0.176 | -0.712 | 0.016 |
| No | 0.050 | -0.790 | 0.059 | 0.237 | 0.005 |
| Reallocation of staff to cover UHC activities | Yes | 0.135 | 2.900 | 0.131 | 2.867 | 0.128 |
| No | 0.019 | -0.414 | 0.019 | -0.410 | 0.018 |
| Healthcare worker complaints about increased workload | Yes | 0.135 | 2.900 | 0.131 | 2.867 | 0.128 |
| No | 0.019 | -0.414 | 0.019 | -0.410 | 0.018 |
| Amount owed to the healthcare facility by the ANACMU (CFA Francs) | Less than 10 million | 0.049 | -0.898 | 0.063 | 0.191 | 0.003 |
| More than 10 million | 0.082 | 1.496 | 0.105 | -0.318 | 0.005 |
| Inertia |  |  | 0.1675 |  | 0.0259 |  |
| % of projected inertia |  |  | 71.8 |  | 11.1 |  |
| **Supply of HIV and Tuberculosis services** | | | |  |  |  |
| Consultations for key populations | Yes | 0.078 | 1.495 | 8.4 | 0.817 | 2.5 |
| No | 0.047 | -0.897 | 5.0 | -0.490 | 1.5 |
| Psychological Support | Yes | 0.078 | 1.495 | 8.4 | 0.817 | 2.5 |
| No | 0.047 | -0.897 | 5.0 | -0.490 | 1.5 |
| HIV Screening | Yes | 0.008 | 0.241 | 0.5 | -0.632 | 3.5 |
| No | 0.056 | -1.688 | 3.6 | 4.426 | 24.5 |
| HIV Care (Adult/Pediatric) | Yes | 0.084 | 1.375 | 9.5 | 0.218 | 0.2 |
| No | 0.084 | -1.375 | 9.5 | -0.218 | 0.2 |
| ART dispensing | Yes | 0.084 | 1.375 | 9.5 | 0.218 | 0.2 |
| No | 0.084 | -1.375 | 9.5 | -0.218 | 0.2 |
| Tuberculosis Care | Yes | 0.025 | 0.616 | 1.9 | 0.662 | 2.2 |
| No | 0.025 | -0.616 | 1.9 | -0.662 | 2.2 |
| Tuberculosis medicine | Yes | 0.038 | 0.836 | 3.5 | -1.172 | 6.9 |
| No | 0.038 | -0.836 | 3.5 | 1.172 | 6.9 |
| Educational talks about HIV (irrespective of whether or not condoms and lubricant gel are also supplied) | Yes | 0.009 | 0.057 | 0.0 | -1.180 | 10.4 |
| No | 0.028 | -0.170 | 0.1 | 3.539 | 31.3 |
| Therapeutic patient education and discussion groups for HIV, Tuberculosis, or Hepatitis | Yes | 0.037 | 0.884 | 3.9 | -0.523 | 1.4 |
| No | 0.037 | -0.884 | 3.9 | 0.523 | 1.4 |
| HIV post-exposure prophylaxis | Yes | 0.071 | 1.448 | 7.9 | 0.273 | 0.3 |
| No | 0.042 | -0.869 | 4.7 | -0.164 | 0.2 |
| Inertia |  |  | 0.1934 |  | 0.0117 |  |
| % of projected inertia |  |  | 79.5 |  | 4.8 |  |

Discrimination measures how important is the association between the category of a variable and the dimension, while contribution indicates how much the category influences the construction of that axis.

# Appendix E: HF profiles based on the MCA and HCA

| **Health facility profiles** | **N° of HFs (%)** | **N° of participants (%)** | **P-value** |
| --- | --- | --- | --- |
| **Size and availability of healthcare services** |  |  |  |
| *Small-scale HFs* | 3 (50.0) | 290 (92.6) | <0.001 |
| *Large-scale HFs* | 3 (50.0) | 23 (7.4) |
| **UHC-related services** |  |  |  |
| *Limited (3 or fewer services)* | 4 (66.7) | 301 (96.2) | <0.001 |
| *Developed (more than 3 services)* | 2 (33.3) | 12 (3.8) |
| **UHC effects on HFs** |  |  |  |
| *Slightly negatively affected* | 4 (66.7) | 154 (49.2) | <0.001 |
| *Strongly negatively affected* | 2 (33.3) | 159 (50.8) |
| **HIV and tuberculosis services** |  |  |  |
| *Limited* | 2 (33.3) | 245 (78.3) | <0.001 |
| *Comprehensive* | 4 (66.7) | 68 (21.7) |

# Appendix F: Univariate analysis of healthcare seeking behavior

|  | **Seek care (ref. No)** | | | |
| --- | --- | --- | --- | --- |
|  | **Coeff.** | **95% CI** | **p-value** | **LR-test p-value** |
| **Level 1 of Null model: Individual characteristics (categorical)** |  |  |  |  |
| **Sex (ref. Male)** |  |  |  |  |
| *Female* | 0.19 | [-0.22─0.59] | 0.370 | 0.450 |
| **Have you been to school? (ref. No)** | 0.15 | [-0.34─0.65] | 0.541 | 0.595 |
| **Are you married? (ref. No)** | -0.27 | [-1.12─0.58] | 0.538 | 0.430 |
| **Have you ever heard of CBHI? (ref. No)** | 0.29 | [-0.17─0.76] | 0.213 | 0.227 |
| **Are you a member or beneficiary of health insurance or CBHM? (ref. No)** | 0.22 | [0.07─0.37] | 0.003 | 0.398 |
| **Household health insurance category (ref. No health insurance)** |  |  |  |  |
| *Voluntary (i.e., paying) member of CBHI* | 0.65 | [0.20─1.11] | 0.005 | 0.067 |
| *PNBSF beneficiary* | 0.19 | [-0.17─0.56] | 0.303 |  |
| **Overall, do you think your health is…. ? (ref. Good)** |  |  |  |  |
| *Very good to excellent* | -0.12 | [-0.70─0.46] | 0.684 | 0.622 |
| *Poor to very poor* | 0.24 | [0.04─0.43] | 0.016 |  |
| **In comparison to last year, how would you assess your current state of health? (ref. Similar)** | | | |  |
| *Better* | 0.41 | [-0.79─1.62] | 0.503 | 0.016 |
| *Not as good* | 0.80 | [0.57─1.04] | <0.001 |  |
| **Do you currently have a disability? (ref. No)** | -0.62 | [-0.88─ -0.36] | <0.001 | 0.095 |
| **Do you have a chronic illness? (ref. No)** | 0.61 | [0.24,0.98] | 0.001 | 0.061 |
| **When you are sick, is trying to find the money to pay for care difficult? (ref. No)** | -0.48 | [-0.96─0.01] | 0.054 | 0.187 |
| **When you are sick, is the distance from your home to a healthcare facility a problem? (ref. No)** | -0.49 | [-0.98─ -0.00] | 0.049 | 0.038 |
| **When you are sick, is it difficult to find a means of transport to go to a healthcare facility? (ref. No)** | -0.54 | [-0.71─ -0.36] | <0.001 | 0.023 |
| **When you are sick and you wish to receive medical care, does wanting someone to accompany to go to a healthcare facility create a problem for you? (ref. No)** | -0.49 | [-0.85─ -0.13] | 0.008 | 0.116 |
| **In the last 12 months, how often have you had difficulties paying for food? (ref. Rarely to ever)** | | | |  |
| *Sometimes to always* | -0.56 | [-0.89─-0.23] | <0.001 | 0.018 |
| **Individual characteristics (continuous)** |  |  |  |  |
| **Age** | -0.01 | [-0.02─0.01] | 0.404 | 0.495 |
| **How many days did your illness last?** | 0.01 | [-0.002 ─ 0.03] | 0.084 | 0.645 |
| **In your opinion, what is the minimum monthly income you need to cover your household expenses?** | -3.79e-07 | [-2.90e-06─2.14e-06] | 0.768 | 0.747 |
| **Number of dependent infants** | 0.02 | [-0.04─0.08] | 0.579 | 0.638 |
| **Maximum amount you would be willing to pay each year for health insurance coverage** | -2.94e-06 | [<-0,001 ─ >0,001] | 0.906 | 0.940 |
| **Level 2 of Null model: HF characteristics** |  |  |  |  |
| **Size and availability of healthcare services (ref. Large-scale HFs)** |  |  |  |  |
| *Smaller-scale HFs* | 0.08 | [0.07─0.10] | <0.001 |  |
| **UHC-related services (ref. Limited (three or fewer services))** |  |  |  |  |
| *Comprehensive (more than 3 services)* | 3.84 | [0.11─139.53] | 0.562 | 0.335 |
| **UHC effects on HFs (ref. Slightly negatively affected)** |  |  |  |  |
| *Strongly negatively affected* | 0.51 | [0.09─3.01] | 0.456 | 0.425 |
| **HIV and tuberculosis services (ref. Limited (two or fewer HIV and tuberculosis services)** |  |  |  |  |
| Comprehensive (more than two **HIV and tuberculosis services)** | 2.89 | [0.95─8.77] | 0.060 |  |
